# Supplementary material for: Overexpression of miR-194 Reverses HMGA2-driven Signatures in Colorectal Cancer
Source: PubMed Central journal article supplement — Theranostics. 2017 Sep 5;7(16):3889–900. doi: 10.7150/thno.20041 (PMC5667412; doi:10.7150/thno.20041), 2017-09-05
Supplement: thnov07p3889s1.pdf [file thnov07p3889s1.pdf]

*Supplementary Information*

**Overexpression of miR-194 Reverses HMGA2-driven Signatures in Colorectal Cancer**

Hsin-Yi Chang<sup>1,2,\*</sup>, Shu-Ping Ye<sup>1,\*</sup>, Shiow-Lin Pan<sup>1</sup>, Tzu-Ting Kuo<sup>1</sup>, Bia Chia Liu<sup>1</sup>, Yi-Lin Chen<sup>1</sup>, Tsui-Chin Huang<sup>1</sup>

<sup>1</sup>The Ph.D. Program for Cancer Biology and Drug Discovery, College of Medical Science and Technology, Taipei Medical University, Taipei, Taiwan.

<sup>2</sup>Graduate School of Pharmaceutical Sciences, Kyoto University, Japan.

\*These authors contributed equally to this work.

**Author contact**

Corresponding author: Dr. Tsui-Chin Huang; Phone number: 886-2-2736-1661 Ext. 7675; E-mail: [tsuichin@tmu.edu.tw](mailto:tsuichin@tmu.edu.tw)

**Table S1.** List of miRNA targeting genes co-occurred with HMGA2 in CRC patient (NES > 1.85)

| miRNA                       | size | ES     | NES    | NOM p-val | FDR q-val | Onco miR | TS miR | targeting HMGA2 |
|-----------------------------|------|--------|--------|-----------|-----------|----------|--------|-----------------|
| miR-101                     | 227  | 0.5300 | 2.0500 | 0.0000    | 0.0760    |          | ✓      |                 |
| miR-194                     | 93   | 0.5700 | 2.0300 | 0.0020    | 0.0500    | ✓        | ✓      |                 |
| miR-499                     | 62   | 0.5800 | 2.0300 | 0.0020    | 0.0360    |          | ✓      |                 |
| miR-202                     | 89   | 0.5600 | 1.9700 | 0.0020    | 0.0440    |          | ✓      |                 |
| miR-196a / miR-196b         | 123  | 0.5000 | 1.9700 | 0.0000    | 0.0370    | ✓        |        | ✓               |
| miR-495                     | 210  | 0.4800 | 1.9600 | 0.0020    | 0.0340    | ✓        | ✓      |                 |
| miR-518a-2                  | 178  | 0.4900 | 1.9600 | 0.0030    | 0.0290    |          | ✓      |                 |
| miR-217                     | 96   | 0.5600 | 1.9400 | 0.0000    | 0.0300    |          |        |                 |
| miR-141 / miR-200a          | 268  | 0.4600 | 1.9300 | 0.0000    | 0.0300    | ✓        | ✓      |                 |
| miR-139                     | 110  | 0.5200 | 1.9200 | 0.0030    | 0.0300    |          | ✓      |                 |
| miR-29a / miR-29b / miR-29c | 441  | 0.4500 | 1.9100 | 0.0000    | 0.0280    |          | ✓      |                 |
| miR-182                     | 32   | 0.6300 | 1.9100 | 0.0040    | 0.0260    | ✓        |        |                 |
| miR-524                     | 382  | 0.4500 | 1.8800 | 0.0020    | 0.0310    |          | ✓      |                 |
| miR-490                     | 52   | 0.5500 | 1.8800 | 0.0020    | 0.0300    |          | ✓      | ✓               |
| miR-203                     | 242  | 0.4500 | 1.8800 | 0.0020    | 0.0290    | ✓        | ✓      | ✓               |
| miR-9                       | 203  | 0.4800 | 1.8700 | 0.0000    | 0.0280    | ✓        | ✓      | ✓               |
| miR-369-3p                  | 172  | 0.5200 | 1.8700 | 0.0020    | 0.0270    |          | ✓      |                 |
| miR-188                     | 69   | 0.5200 | 1.8600 | 0.0020    | 0.0280    |          | ✓      |                 |
| miR-186                     | 230  | 0.4600 | 1.8600 | 0.0030    | 0.0270    |          | ✓      | ✓               |
| miR-200a                    | 42   | 0.5600 | 1.8600 | 0.0070    | 0.0270    |          | ✓      |                 |

**Table S2.** Primers used for detecting gene expression levels in this study

| Name               | Direction | Sequence (5'-3')          |
|--------------------|-----------|---------------------------|
| hsa-miR-194-5p     | Forward   | UGUAAACAGCAACUCCAUGUGGA   |
|                    | Reverse   | mRQ 3' Primer*            |
| HMGA2              | Forward   | CCCAAAGGCAGCAAAAACAA      |
|                    | Reverse   | GCCTCTTGGCCGTTTTTCTC      |
| VAPA               | Forward   | AGGCTCAGAAAGGTAGCACA      |
|                    | Reverse   | GTGAAGGAAGAGGACTGGTGA     |
| GAPDH              | Forward   | TGCACCACCAACTGCTTAGC      |
|                    | Reverse   | GGCATGGACTGTGGTCATGAG     |
| RNU44              | Forward   | CCTGGATGATGATAAGCAAAT G   |
|                    | Reverse   | GAGCTAATTAAGACCTTCATGTTCA |
| miR-194-1 promoter | Forward   | TGGCTGATGTCATAGTTGCTCA    |
|                    | Reverse   | GTGGGTGAAACCACTTACCAGT    |
| miR-194-2 promoter | Forward   | TCTTGCAAAGCGTGTTCG        |
|                    | Reverse   | TATGCACCACTGGCAAAGGG      |
| LIN28B             | Forward   | TGATAAACCGAGAGGGAAGC      |
|                    | Reverse   | TGTGAATTCCACTGGTTCTCC     |
| ERGIC2             | Forward   | CTGAGGAGCACATGCCATTC      |
|                    | Reverse   | CCAAGTCTGAAACGACAGCAA     |
| ZBTB39             | Forward   | AAGAATGTTGCCAGTGACGC      |
|                    | Reverse   | AATGGACGTGAAGGGAGCAG      |
| MIB1               | Forward   | ATGAGTAACTCCCGAATAACCG    |
|                    | Reverse   | GCCGTTGTCCCACACTACC       |
| EPC2               | Forward   | CAGCGAGCAATTCAGCACA       |
|                    | Reverse   | TGCCTCAGGAACAGGAATGAC     |
| FBXW7              | Forward   | CGACGCCGAATTACATCTGTC     |
|                    | Reverse   | CGTTGAAACTGGGGTTCTATCA    |
| SUMO2              | Forward   | GACGGGCAACCAATCAATGAA     |
|                    | Reverse   | GTTCTGGAGTAAAGAAGCAGGT    |
| EHP1               | Forward   | ACCTCTACTTTACCACCACCAC    |
|                    | Reverse   | CTCCAATACCAATCACTCACAAGG  |
| SEPHS1             | Forward   | ACTTGTCATTCCTTTGAGGC      |
|                    | Reverse   | CCCATCATGTAAGGGTCGTCTA    |
| CHD6               | Forward   | GCTTCACAAGCACACGGCTA      |
|                    | Reverse   | GCAGGCTCCAGAAAGAACCT      |
| STX16              | Forward   | TTGGCTCTTCCATTGCCACT      |
|                    | Reverse   | CACGCTCACACAAACGAGG       |
| DEPDC1B            | Forward   | AGATTTGCTGCCTTCTCCTACC    |
|                    | Reverse   | GTCCACTTCATCCTTGAACAC     |
| ARHGAP5            | Forward   | TACATTCTGGCAGTCGGTGT      |
|                    | Reverse   | TCATCCACGGGTTTACTTGG      |
| RSBN1              | Forward   | CACACTCAGGTCAACAGGACA     |
|                    | Reverse   | ACGAGACTTATCTGCCGCAT      |
| QKI                | Forward   | GTCGAAATAGGTGTTACAGGTC    |
|                    | Reverse   | TGCAGTTGGCTTGAGAGGAT      |
| CHD4               | Forward   | GTAAGAGACCTGCGAGGCAA      |
|                    | Reverse   | GTAAGGACATGCTGGCGAGA      |
| NCL                | Forward   | AAGCGTTGGAACCTACTGGT      |
|                    | Reverse   | AAGTGTTCTCGCATCTCGCT      |
| CEP350             | Forward   | TTGGGTCTCGGAAATGCTC       |
|                    | Reverse   | CTACAGCTCAACATCACAAGCC    |
| KLF12              | Forward   | GCCACTTGTCATGGTTTAGCC     |
|                    | Reverse   | TCACACTCTGTTGAGGAGGGA     |
| PAN3               | Forward   | CTTTGGTGCCCTCAACATCTC     |
|                    | Reverse   | ATCCCATCGGAAGTAGCCTCT     |
| YTHDF1             | Forward   | TCAACCGCAGTATCAGAGCC      |
|                    | Reverse   | AGGAGAGTTGCTATCGCTGC      |
| AP1G1              | Forward   | GCGCCTACAAGCAAACCATC      |
|                    | Reverse   | AGCCCATCCAACAAGAAGGG      |

\*mRQ 3' Primer were supplied with Mir-X™ miRNA First-Strand Synthesis and SYBR qRT-PCR kit (Takara Bio Inc., Japan)

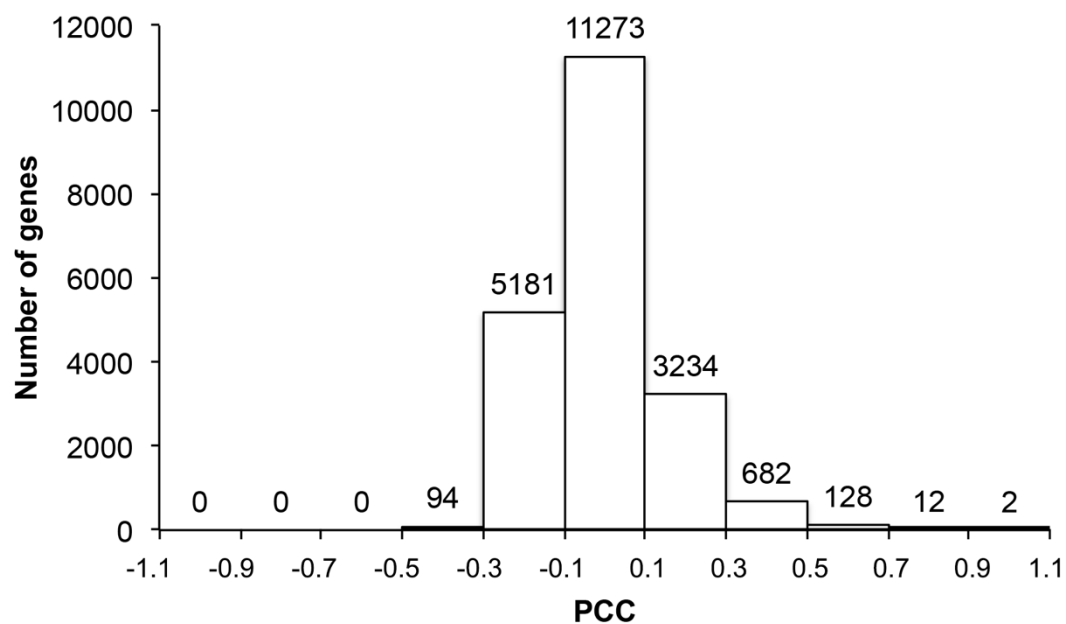

**Figure S1.** Distribution of global gene expression correlations to HMGA2 in CRC patients. To perform the correlation analysis between 20,606 genes and HMGA2 expressed in CRC patients, Pearson's correlation coefficient (PCC) was calculated and the frequency is shown.

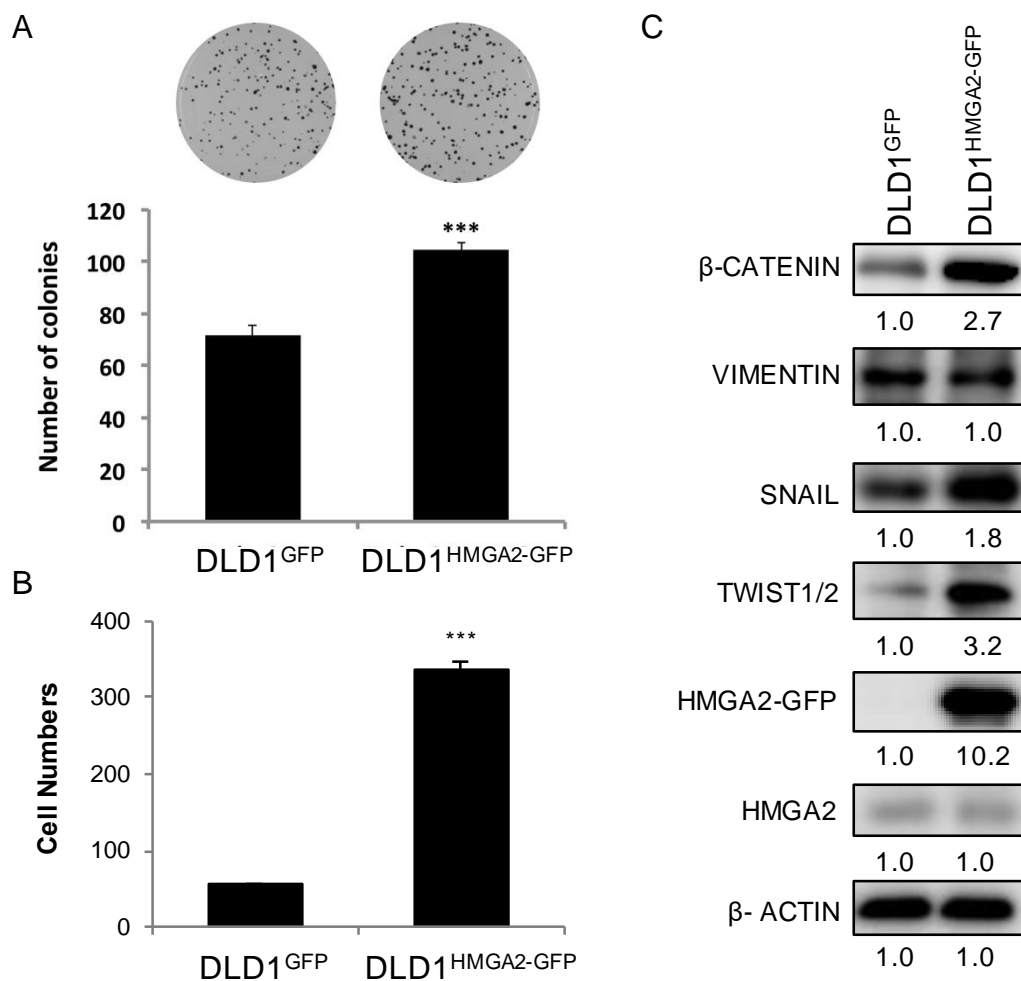

**Figure S2.** HMGA2 overexpression enhanced the tumorigenesis ability of DLD1 cells. To examine the effects of HMGA2 on cell grow, we chose DLD1, a cell line express low levels of HMGA2, to perform the colony formation assay. (A) DLD1 cells overexpressing TurboGFP-HMGA2 or TurboGFP were seeded onto 6-well plates for 10 days until the colonies formed, and the number of colonies was counted. \*\*\*  $P < 0.001$ . (B) Cell migration was measured using transwell migration assay. Migrated cells were counted. Data was obtained from three independent experiments. \*\*\*  $P < 0.001$ . (C) Protein level of EMT markers. Quantification results were normalized to the level of β-ACTIN and compared to DLD1<sup>GFP</sup> control cells.

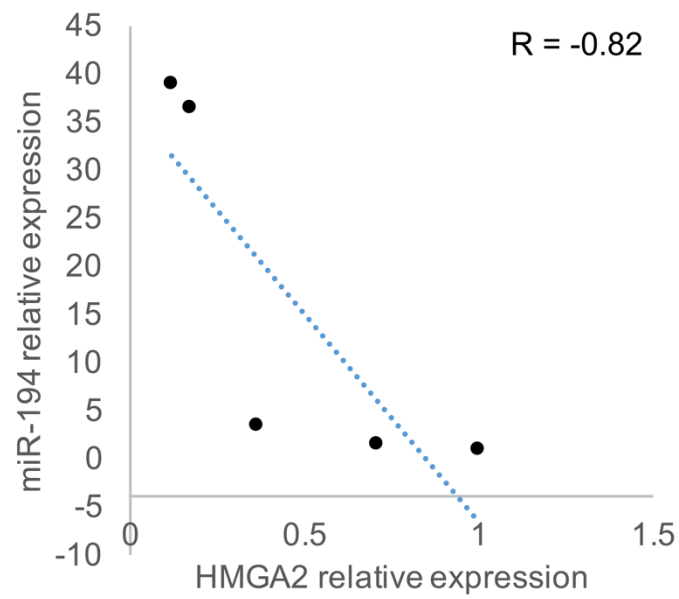

**Figure S3.** Relative expression of miR-194 and HMGA2 in CRC cells. RNA was extracted by Trizol and reverse-transcribed into cDNA. The relative level of HMGA2 mRNA and miR-194 were determined by real-time PCR and normalized to GAPDH and RUN44, respectively. Data is presented by the difference between the internal controls ( $-\Delta Ct$ ).

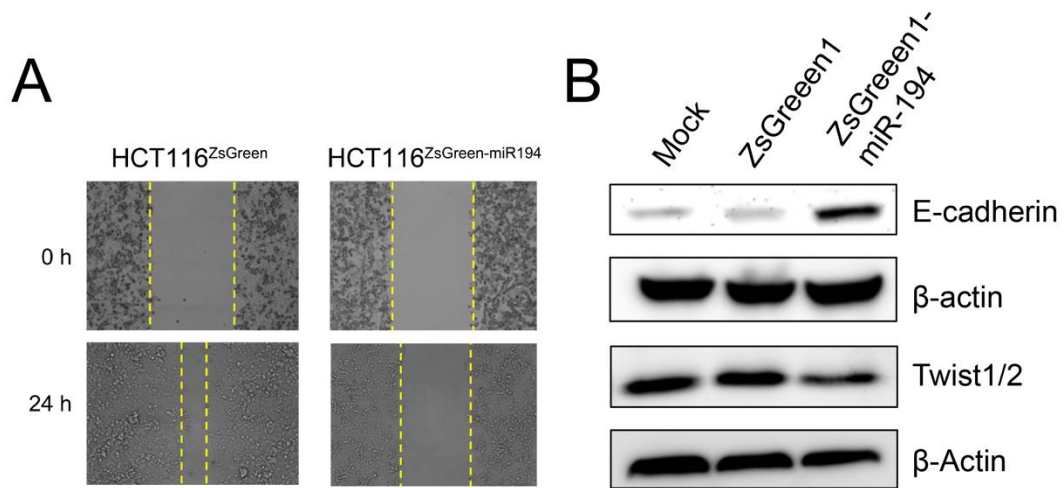

**Figure S4.** Overexpression of miR-194 reduced cell migration and EMT process. (A) Wound-healing assay was performed to evaluate the cell migratory activity. were compared. Wound gap migration of stable clones harboring ZsGreen1 or ZsGreen1-miR-194 was imaged at time 0-hour (upper panel) and after 24 hours (lower panel). The yellow dashed lines mark the migratory front edges. (B) Protein levels of two EMT markers, E-cadherin and Twist1/2 were measured by western blot and  $\beta$ -Actin was used as loading control.

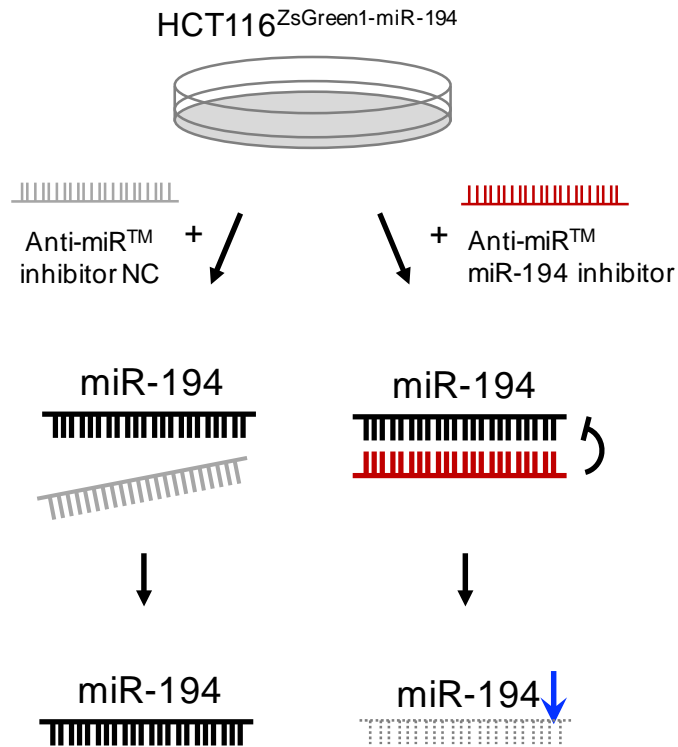

**Figure S5.** Knockdown of miR-194. To deplete miR-194 expression, we applied miRNA inhibitor, Anti-miR<sup>TM</sup> miR-194 inhibitor and the Anti-miR<sup>TM</sup> inhibitor negative control (NC). miR-194 inhibitor complementary binds to endogenous miR-194 and inhibits miR molecules.

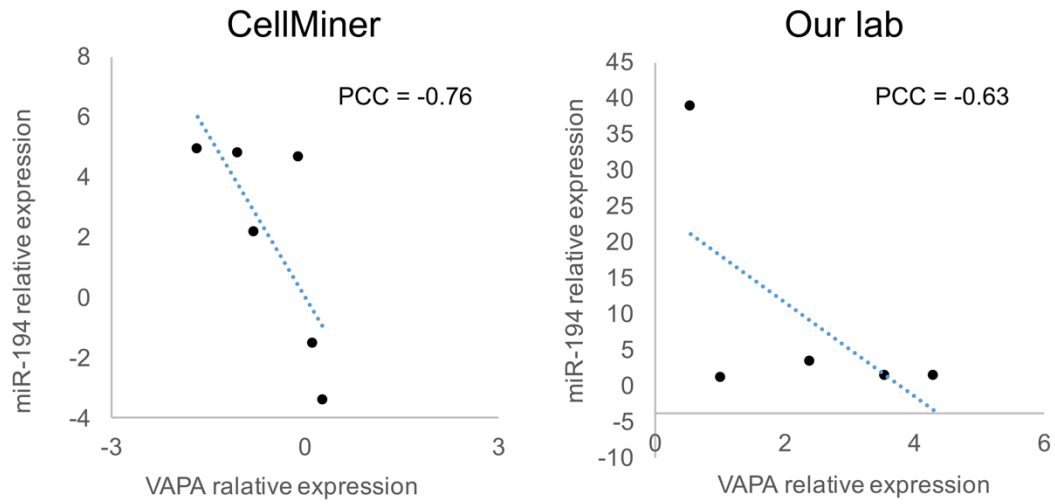

**Figure S6.** Correlation of miR-194 and VAPA. Correlation between expression of HMGA2 and miR-194 in CRC cell lines in (A) CellMiner database and (B) our lab (data was adopted from Figure 5A and 5B).

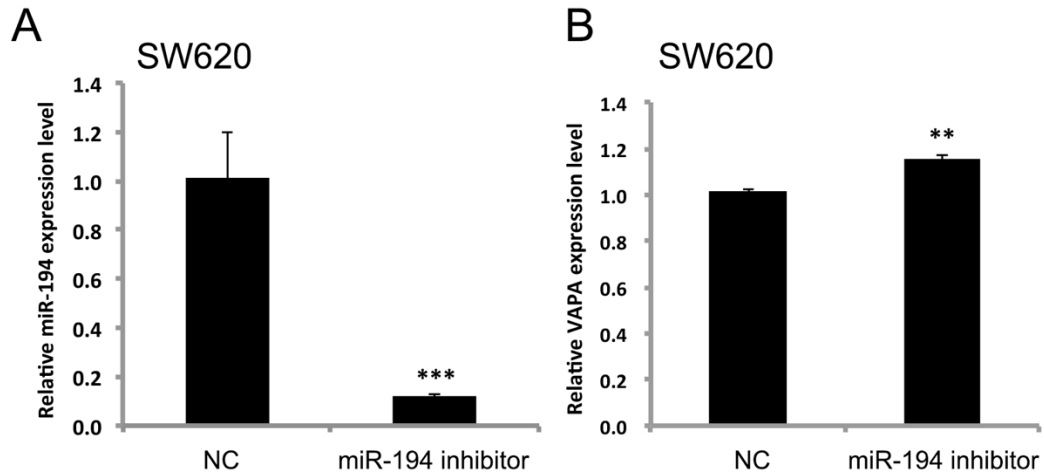

**Figure S7.** VAPA was regulated by miR-194 in SW620. Expression levels of (A) miR-194 and (B) VAPA in miR-194 inhibitor transfected SW620 cells were measured and compared with those of scramble negative control (NC) transfected ones. RUN44 and GAPDH were used as internal control for normalizing miR-194 and VAPA, respectively.

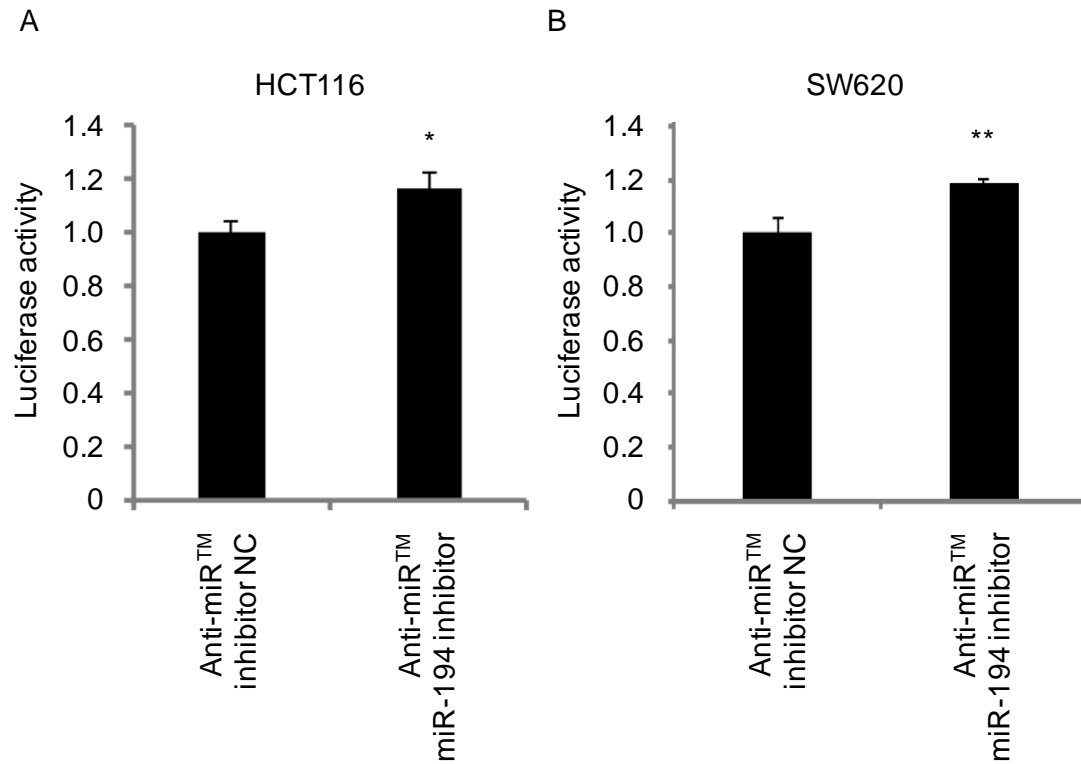

**Figure S8.** 3'UTR luciferase assay. pMIR-Luc-VAPA 3'UTR and internal control  $\beta$ -galactosidase reporter were transfected with anti-miR miR-194 inhibitor or scramble negative control (NC) into (A) HCT116 or (B) SW620 cells. Dual-light reporter assay was performed and compared with cells transfected with anti-miR inhibitor negative control (NC). \*\*  $P < 0.005$ .

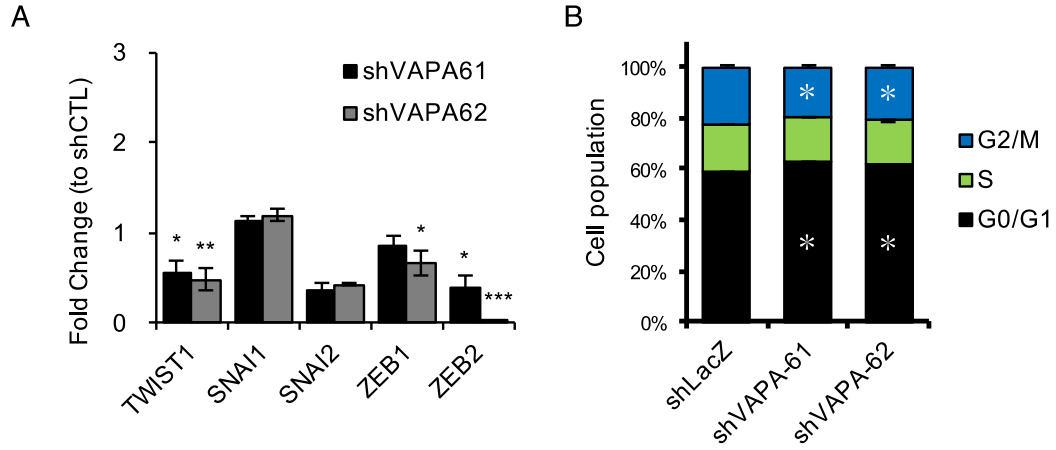

**Figure S9.** Knockdown of VAPA reduced EMT markers and increased cell population in G<sub>0</sub>/G<sub>1</sub> phase. Knockdown of VAPA in HCT116 cells was performed to inspect the function of VAPA. (A) mRNA level of selected EMT markers were measured by qPCR, normalized to GAPDH, and compared with that in cells transfected with shCTL. \*  $P < 0.05$ ; \*\*  $P < 0.01$ ; \*\*\*  $P < 0.001$ . (B) DNA content was analyzed with flow cytometry. Cells were fixed with 70% ethanol, RNA was digested, DNA was stained with propidium iodide (PI). \*  $P < 0.05$ .
